# Supplementary material
Source: MDPI journal article supplement (https://www.mdpi.com/1999-4907/10/11/1037)
Supplement: s1 [file s1]

## Supplementary material

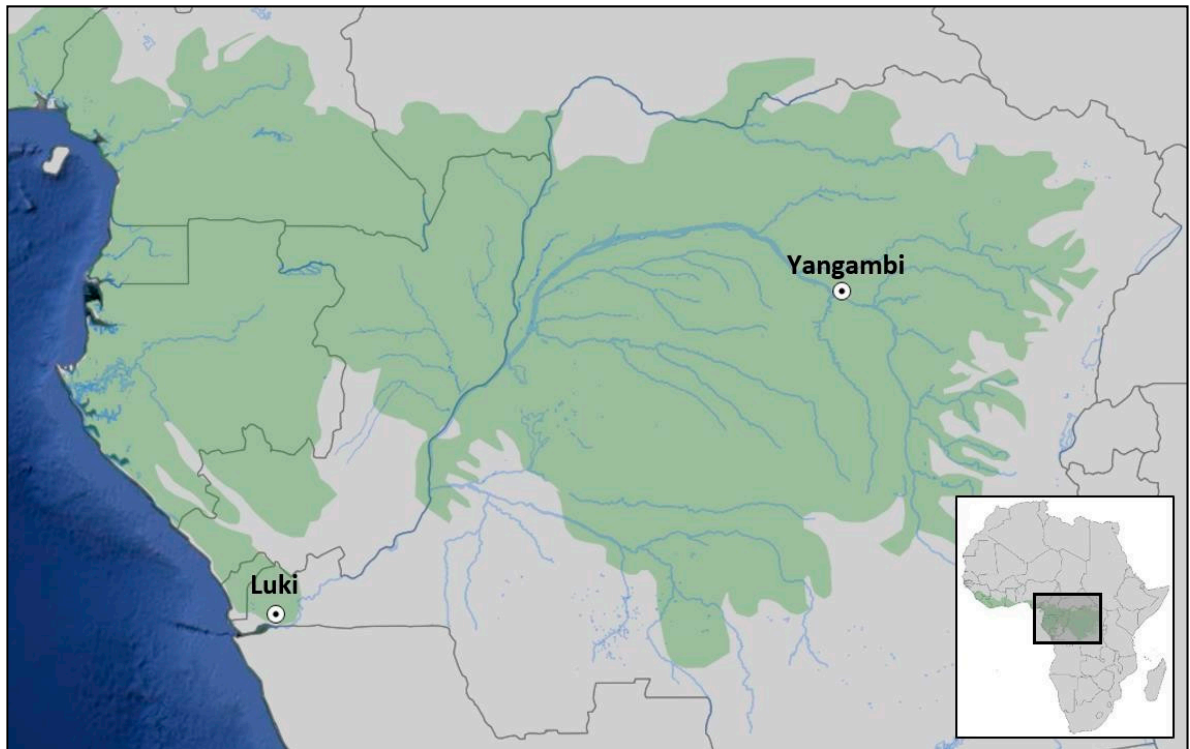

**Figure S1.** Map indicating the sampling locations in the Democratic Republic of Congo: Luki Biosphere Reserve and Yangambi Biosphere Reserve.
